# Supplementary material for: The ameliorative mechanism of Lactiplantibacillus plantarum NJAU-01 against d-galactose induced oxidative stress: a hepatic proteomics and gut microbiota analysis
Source: Royal Society of Chemistry journal article supplement (doi:10.1039/d4fo00406j), 2024-01-01
Supplement: d4fo00406j1.pdf [file d4fo00406j1.pdf]

## Supplementary Materials

### Materials and methods

#### Quantitative real-time PCR analysis

Total RNA was extracted from liver of each treatment group with Trizol reagent and was reverse transcribed into cDNA. Then, the cDNA sample was quantified before conducting the quantitative real-time PCR (RT-PCR) analysis with specific primers (Table S1). The results were calculated by  $2^{-\Delta\Delta ct}$  method and expressed as a ratio compared to GAPDH.

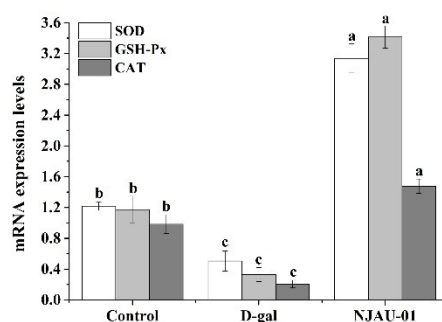

Fig. S1 *L. plantarum* NJAU-01 modulates the mRNA expressions of antioxidant enzymes including SOD, GSH-Px and CAT

Table S1 Primers in the present study

| Gene   | Forward primer (5' – 3') | Reverse primer (5' – 3') |
|--------|--------------------------|--------------------------|
| GSH-Px | GAACGAGGAGATCCTGAACAGC   | GGTAGGGCAGCTTGCTTTTCAG   |
| SOD    | TAACTGAAGGCCAGCATGGGT    | GGTCTCCAACATGCCTCTCTTC   |
| CAT    | TTGTTCAAGTACCGAGGGATT    | TTCCTGAGCAAGCCTTCCTG     |
| GAPDH  | AAGCCCATCACCATCTTCCA     | CCTGCCTCACCACCTTCTTG     |
